# Supplementary material for: Preparation of N-doped yellow carbon dots and N, P co-doped red carbon dots for bioimaging and photodynamic therapy of tumors
Source: Royal Society of Chemistry journal article supplement (doi:10.1039/c8nj06351f), 2019-01-01
Supplement: c8nj06351f1.pdf [file c8nj06351f1.pdf]

† Electronic supplementary information (ESI)

## Preparation of N-doped yellow carbon dots and N, P co-doped red carbon dots for bioimaging and photodynamic therapy of tumor

Jing Zhao,<sup>a</sup> Futian Li,<sup>b</sup> Shen Zhang,<sup>a</sup> Ying An<sup>\*a</sup> and Shuqing Sun<sup>\*a</sup>

<sup>a</sup> Department of Chemistry, College of Science, Tianjin University, Tianjin, 300350, China.

<sup>b</sup> Chinese Academy of Medical Sciences, Institute of Radiation Medicine, Tianjin, 300192, China

Corresponding Author: [sunshuqing@tju.edu.cn](mailto:sunshuqing@tju.edu.cn), [anying@tju.edu.cn](mailto:anying@tju.edu.cn)

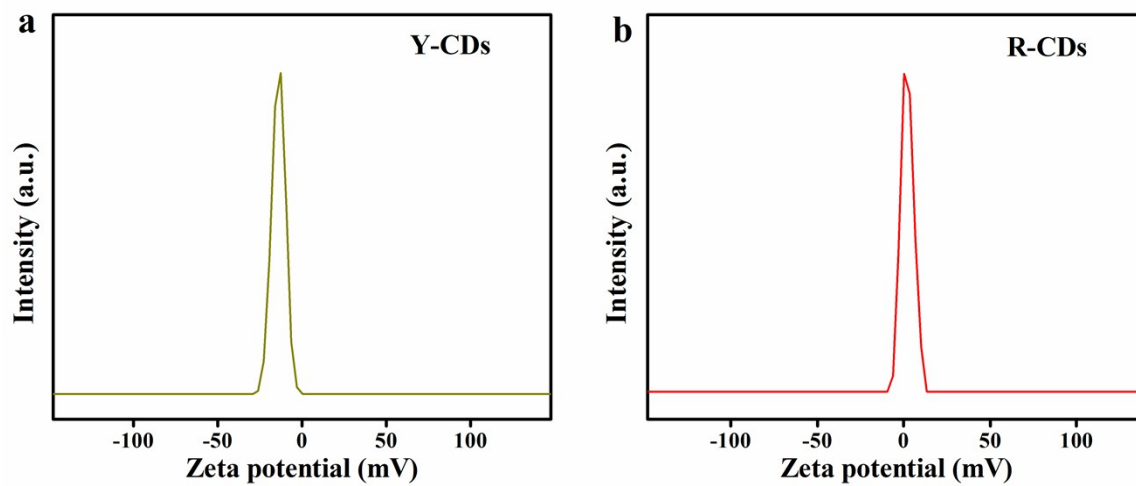

**Fig. S1** The Zeta potential of Y-CDs (a) and R-CDs (b).

**Table S1** XPS data analysis of the C 1s spectra of Y-CDs (top) and R-CDs (bottom).

|       | Type     | Content (%) |
|-------|----------|-------------|
| Y-CDs | C=C/C-C  | 59.9        |
|       | C-N/ C-O | 34.8        |
|       | C=O      | 5.3         |

|       | Type         | Content (%) |
|-------|--------------|-------------|
| R-CDs | C=C/C-C      | 69.2        |
|       | C-N/ C-O/C-P | 27.6        |
|       | C=O          | 3.2         |

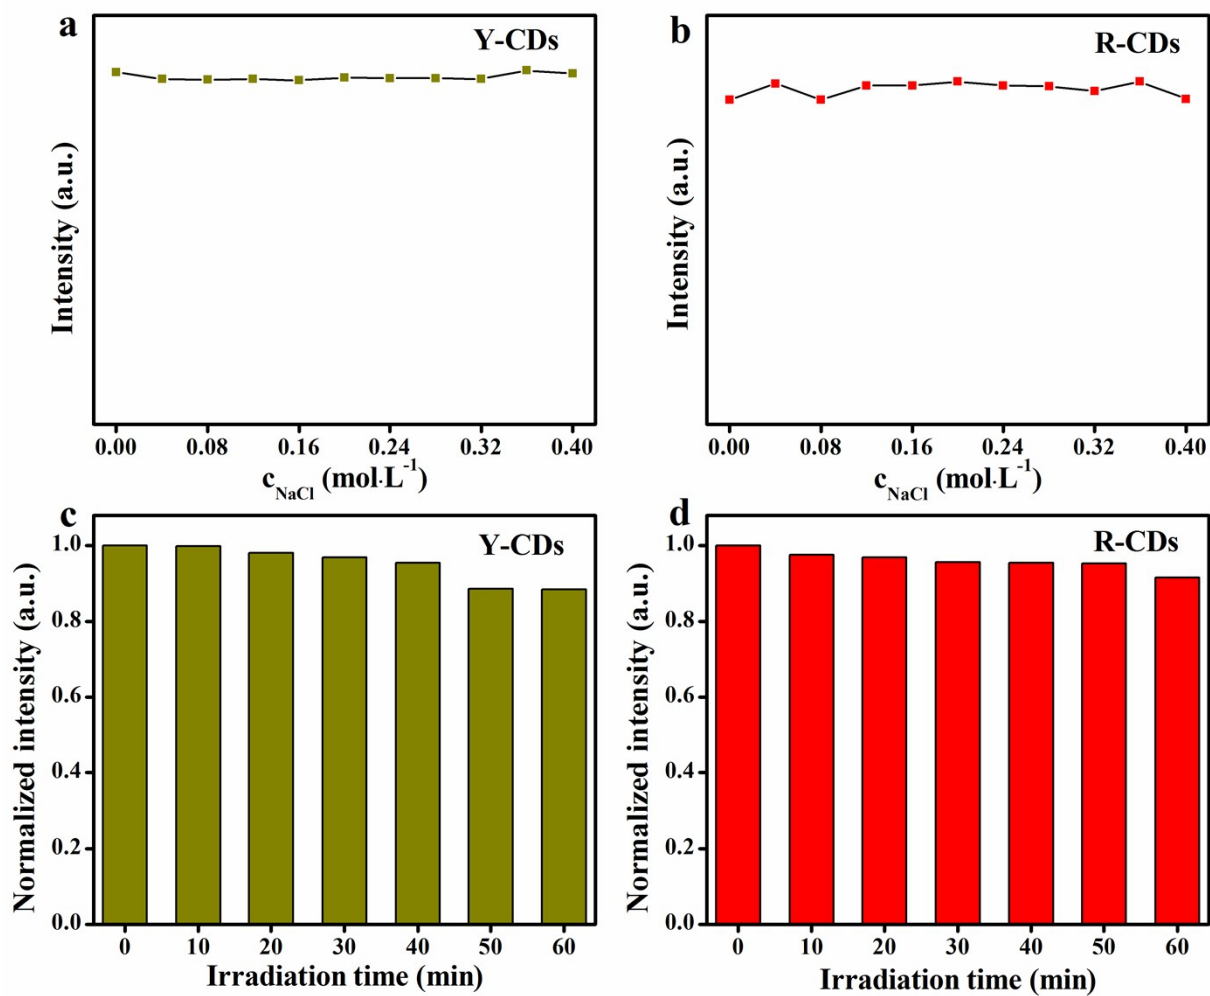

**Fig. S2** Fluorescence intensity of Y-CDs (a) and R-CDs (b) dispersed in different concentrations of NaCl (0 ~ 0.4 mol L<sup>-1</sup>); Fluorescence intensity of Y-CDs (c) and R-CDs (d) at different irradiation times under UV lamp.

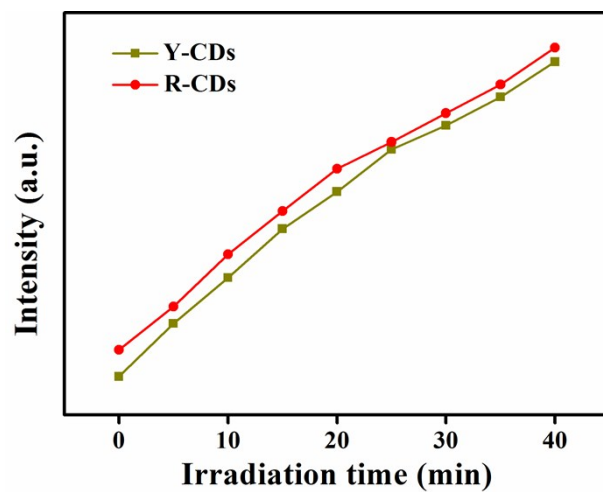

**Fig. S3** Time-dependent fluorescence intensity ( $\lambda_{\text{ex}}/\lambda_{\text{em}} = 504/525$  nm) irradiated with white light ( $100 \text{ mW cm}^{-2}$ ).

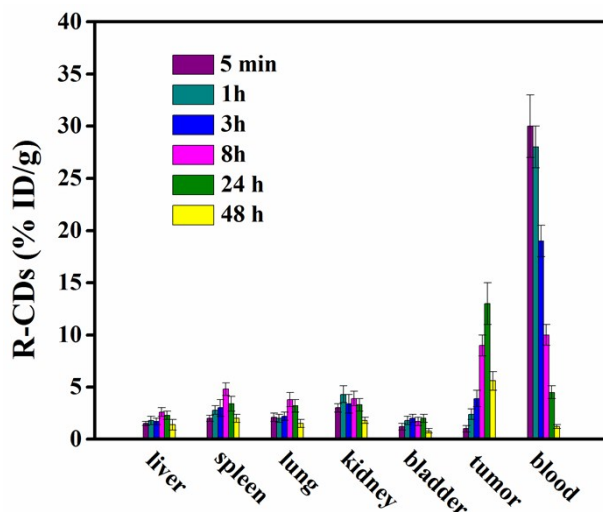

**Fig. S4** Biodistribution of the R-CDs NRs in tumor-bearing mice. Data are expressed as means  $\pm$  s.d. ( $n = 3$ ).

Biodistribution study of the R-CDs was carried out on the mice bearing tumors by intravenous injection of the R-CDs and then extracted the R-CDs from organs and blood. The distribution and the concentration of the R-CDs in the blood, tumor and organs including liver, spleen, lung, kidney and bladder were quantified by ultraviolet–visible spectroscopy after extraction by water. The R-CDs exhibited low uptake by the organs as evidenced by the low  $\% \text{IDg}^{-1}$  (percent injected dose per gram tissue), which prove the biosafety of the R-CDs.
